# Supplementary material
Source: PubMed Central journal article supplement (PMC5941068)

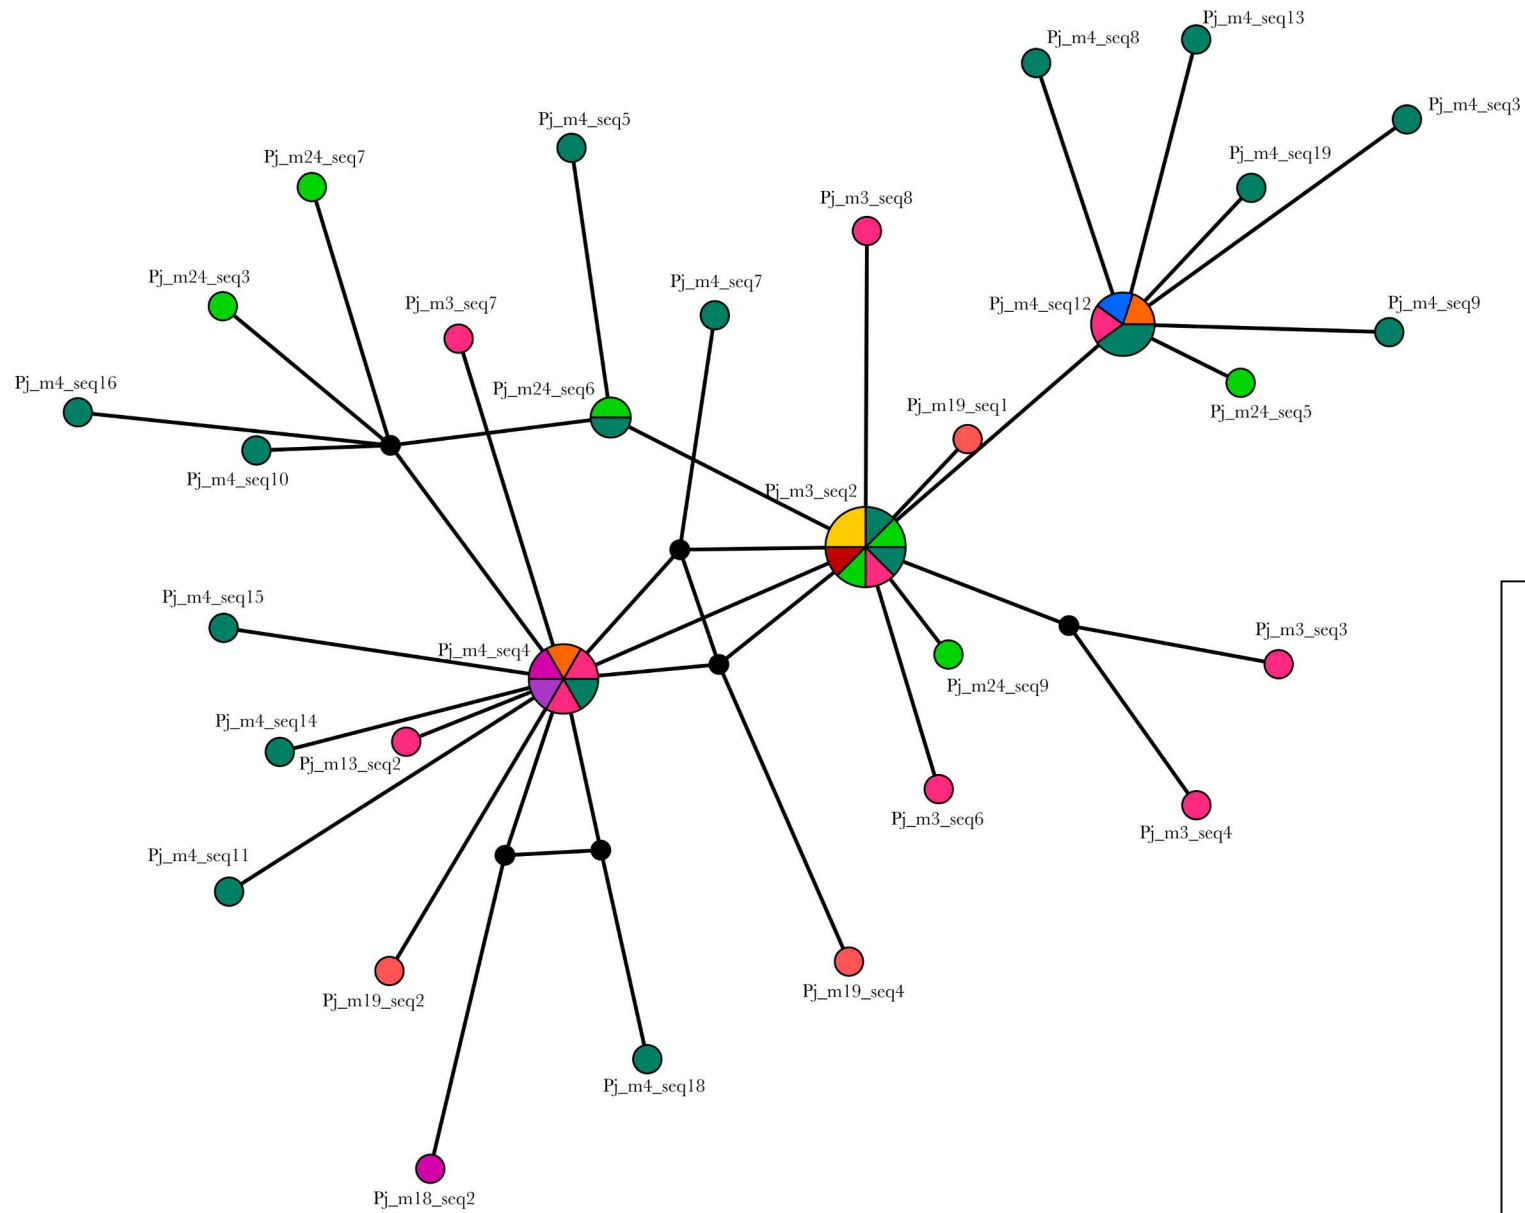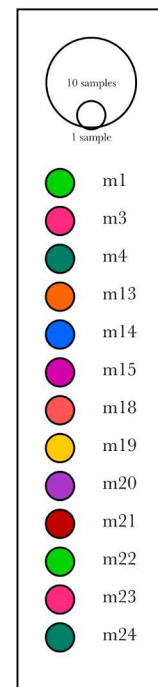

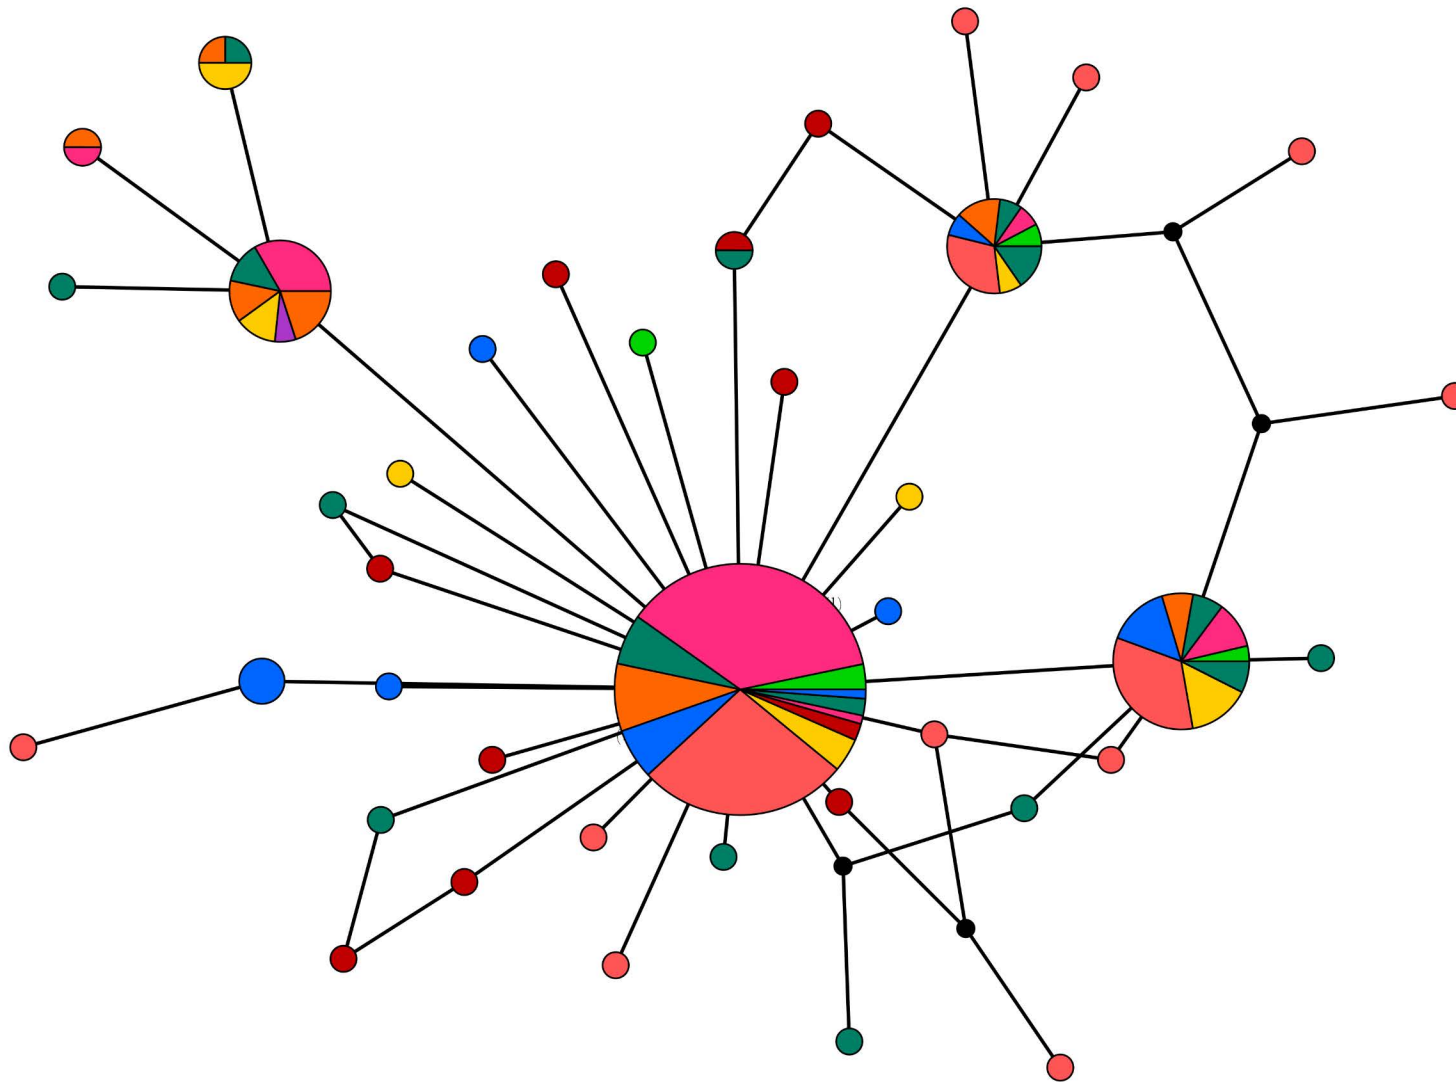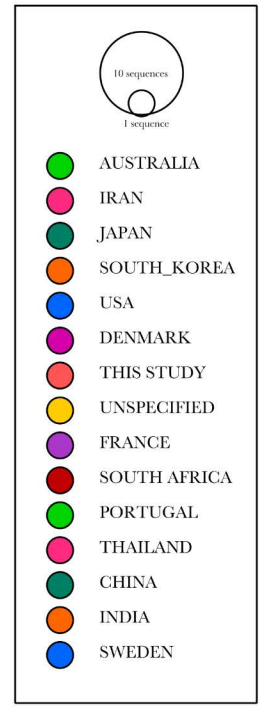

Supplement: mbo003183878sf4.pdf [file mbo003183878sf4.pdf]

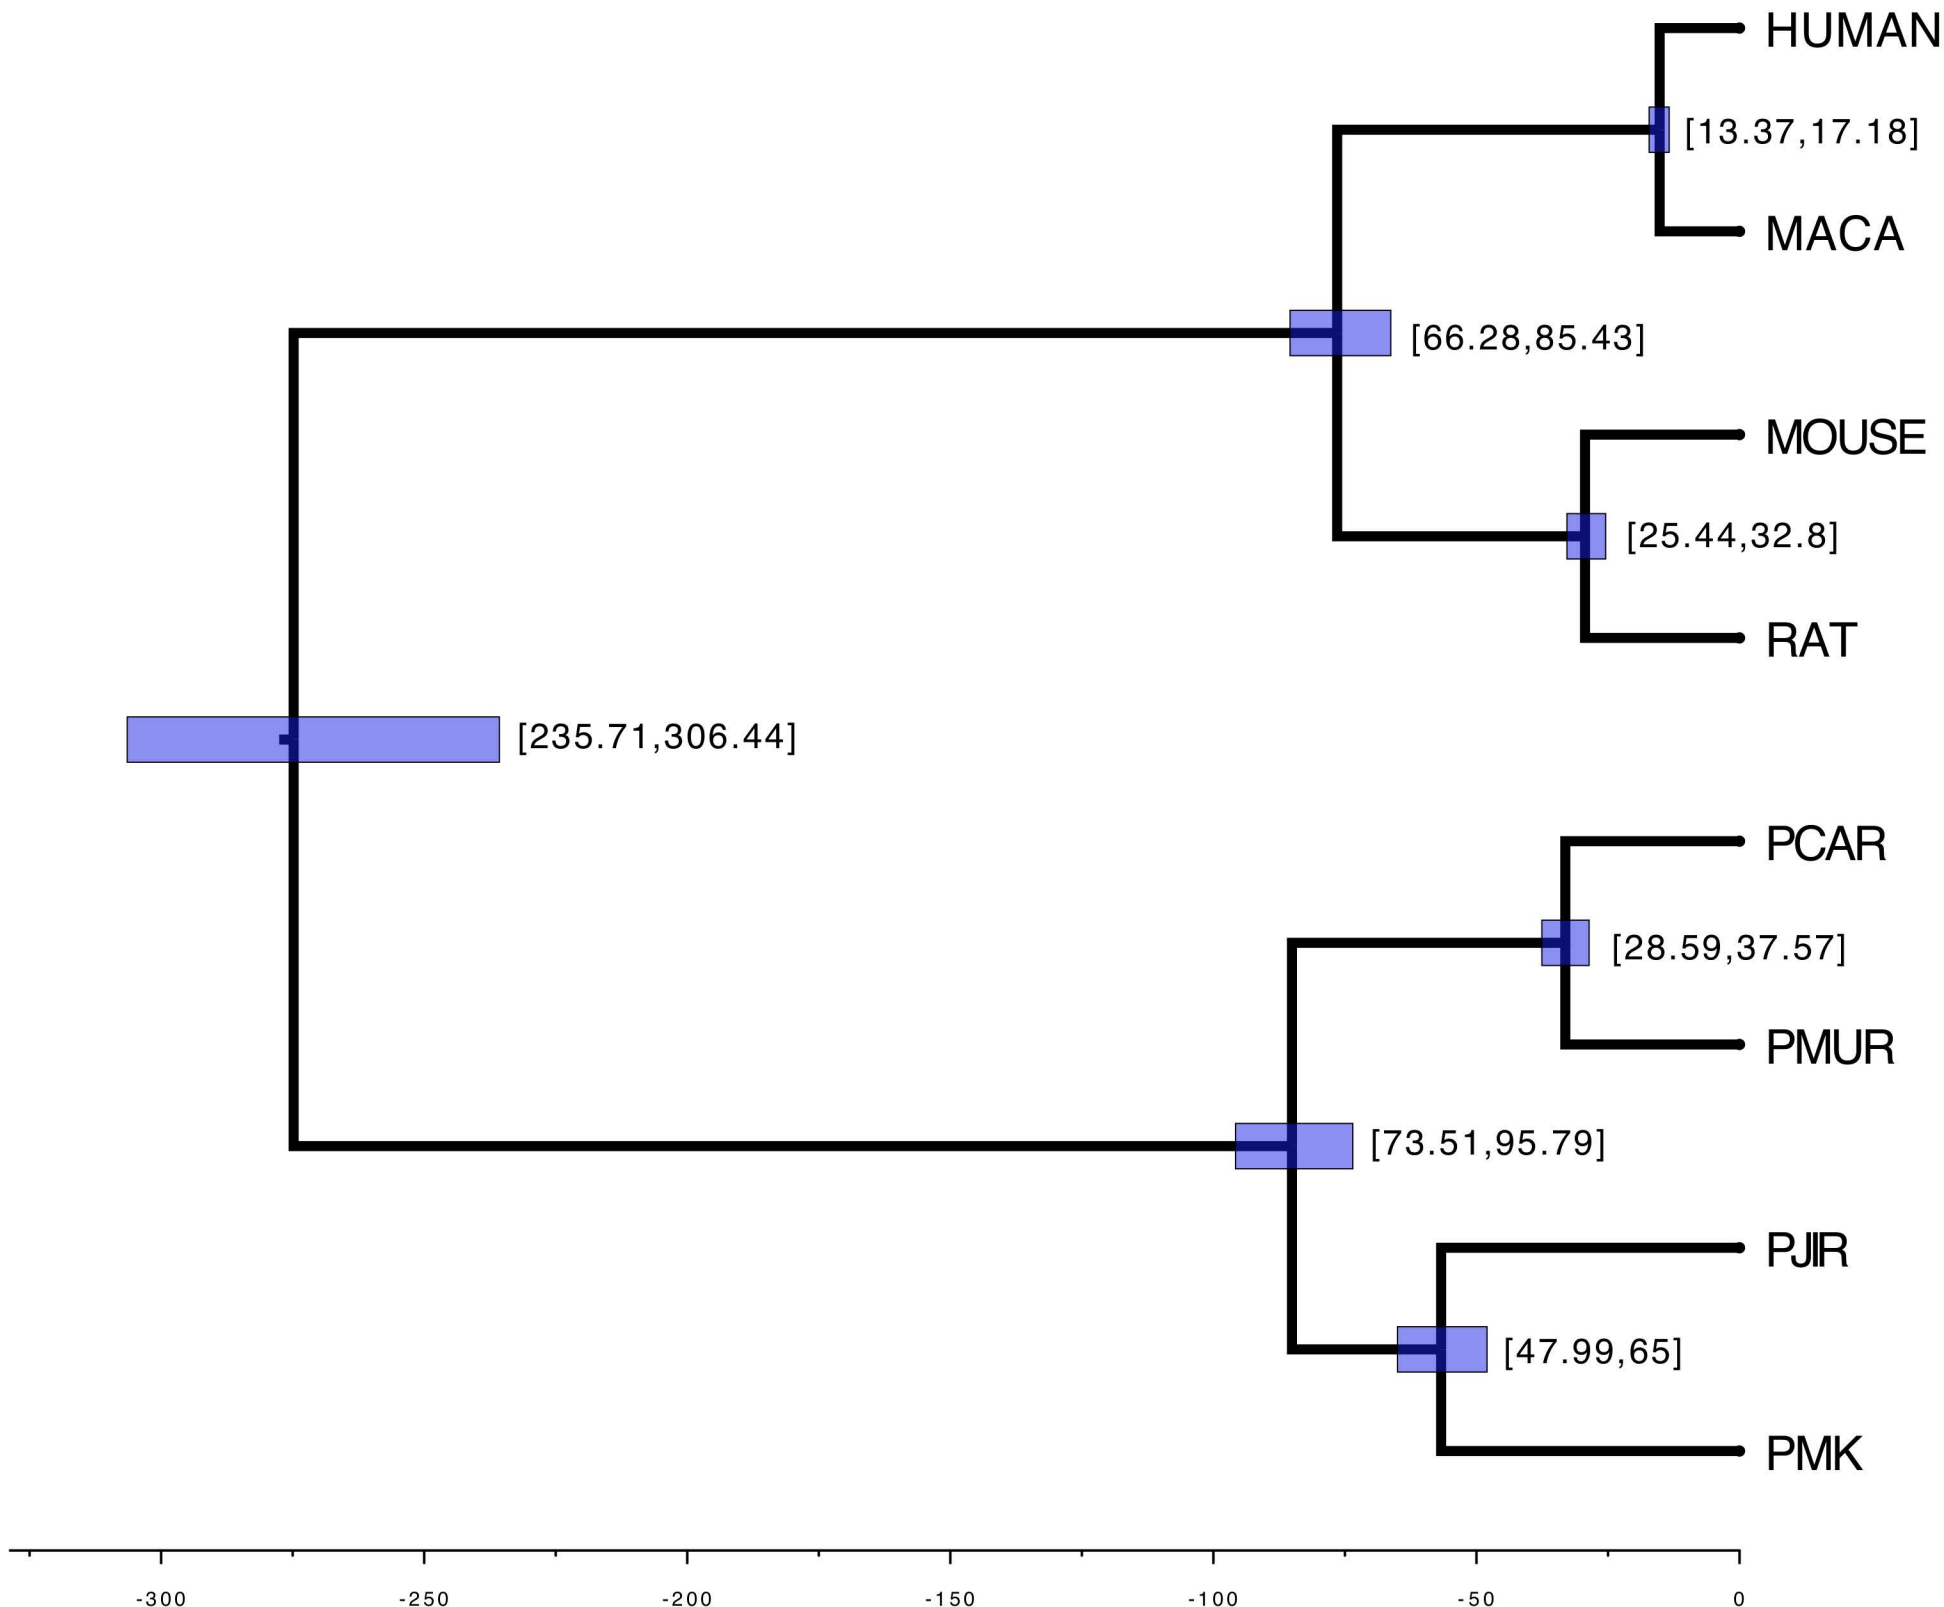

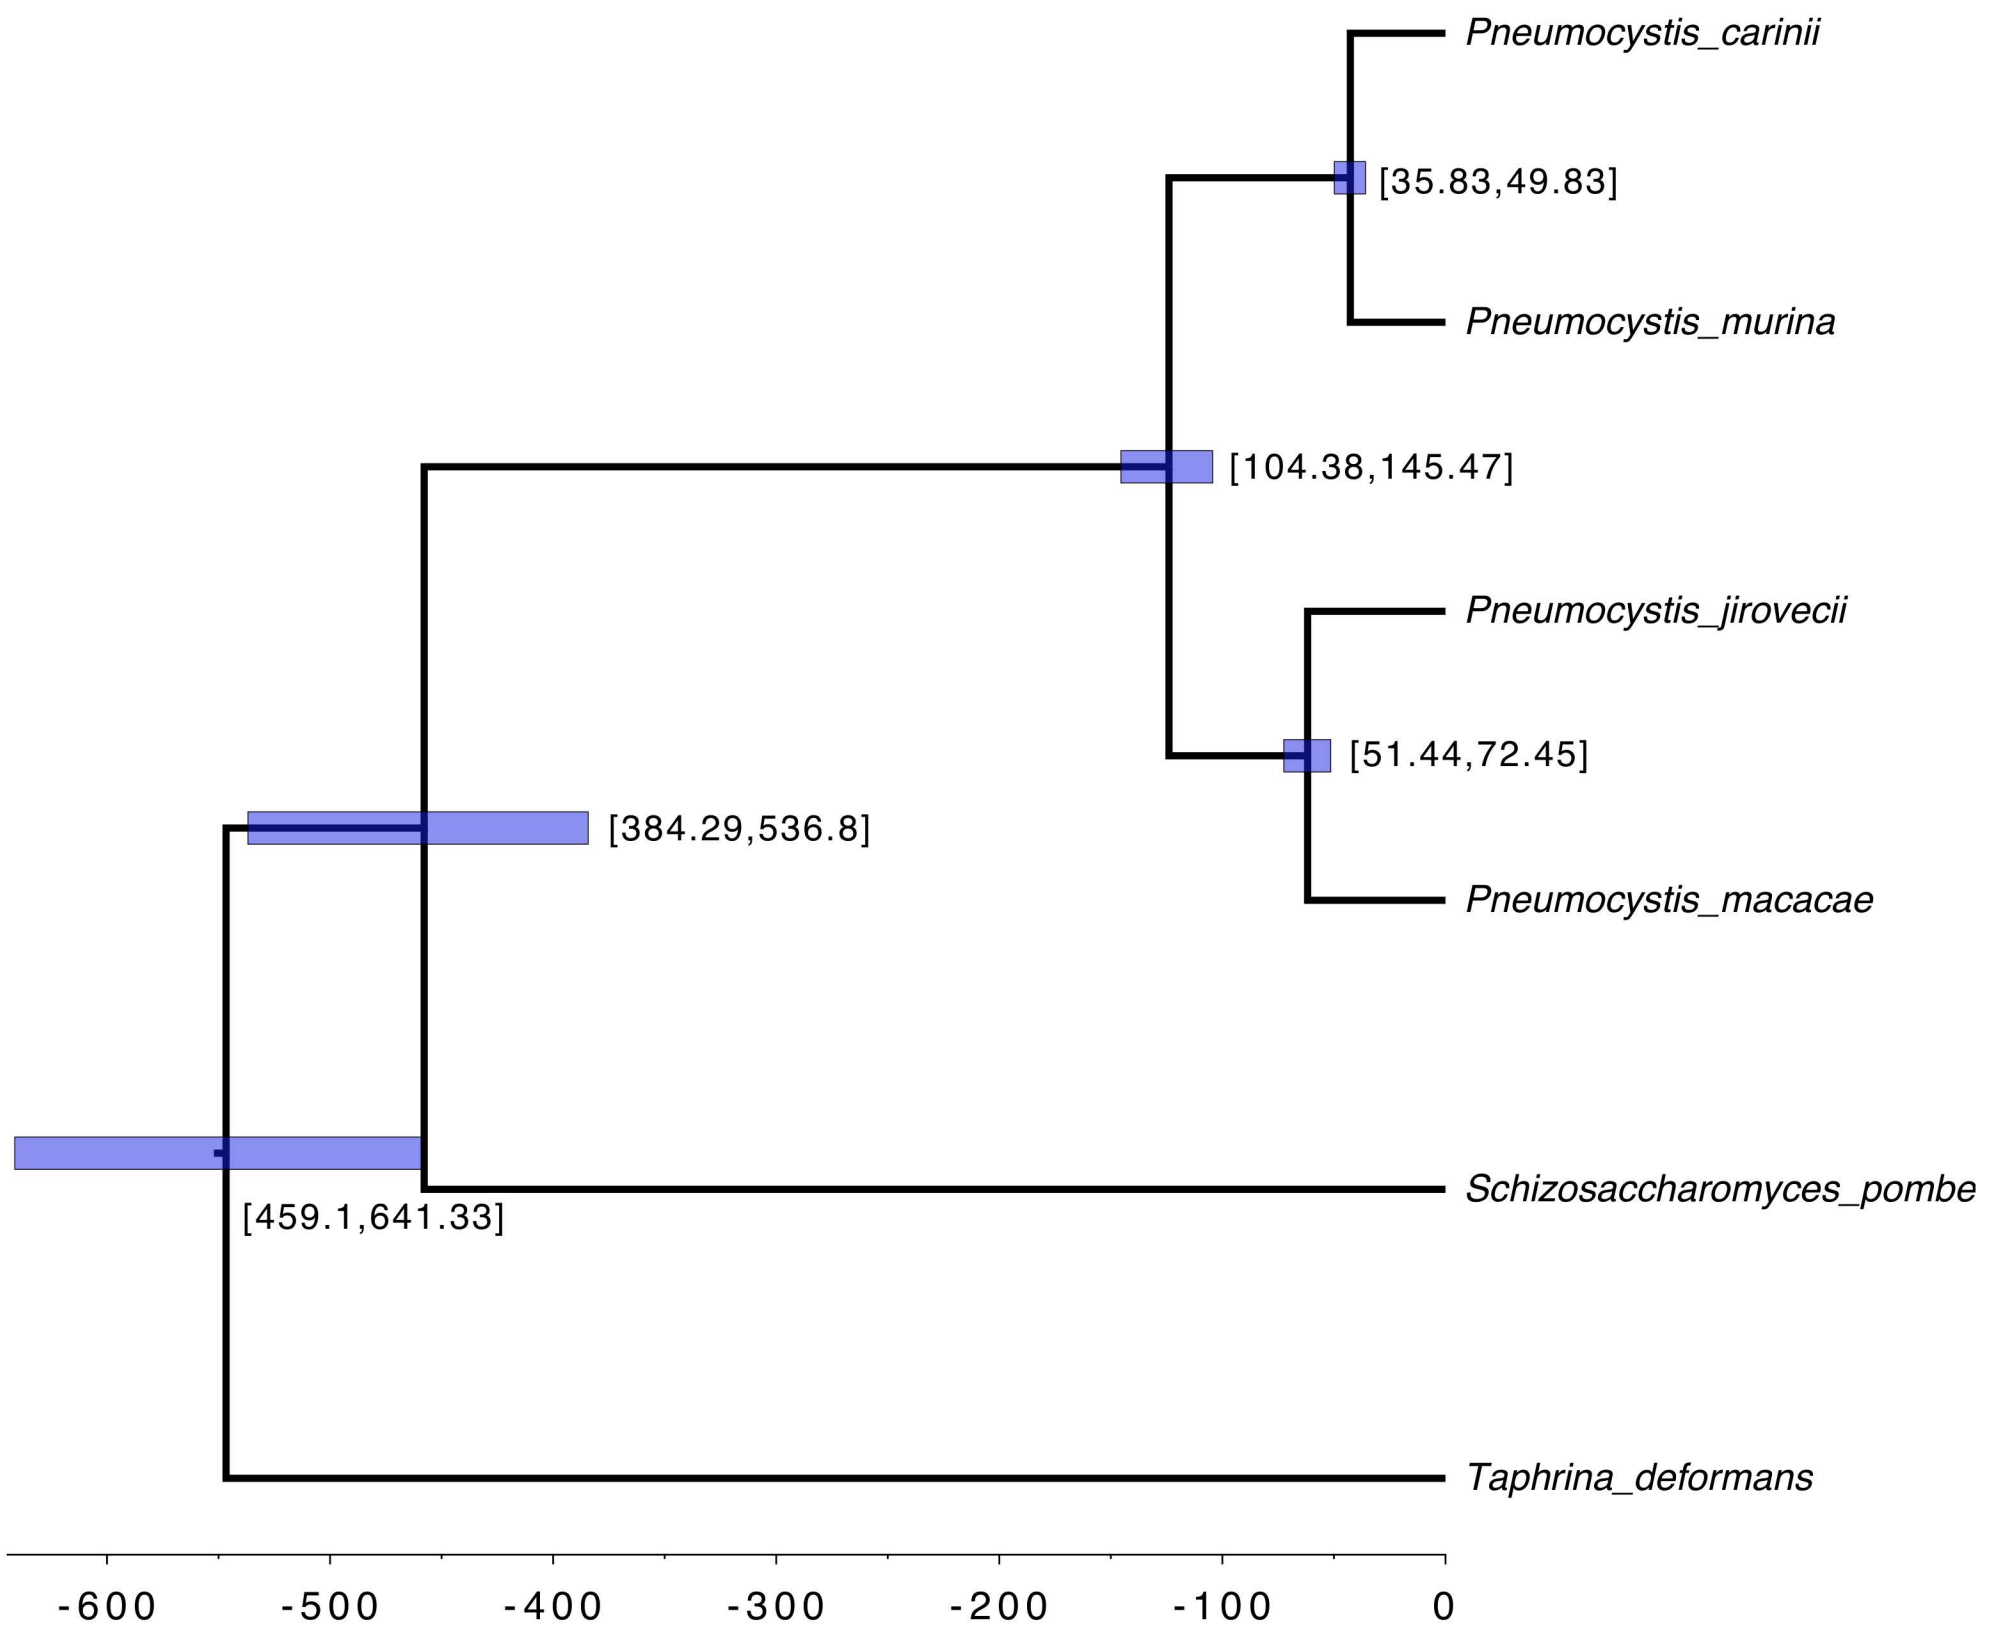

Supplement: mbo003183878sf7.pdf [file mbo003183878sf7.pdf]
